# Supplementary material
Source: ML conference proceedings conference paper supplement (https://proceedings.neurips.cc/paper_files/paper/2022/hash/ad1d7a4df30a9c0c46b387815a774a84-Abstract.html)
Supplement: Supplementary file 1 [file ad1d7a4df30a9c0c46b387815a774a84-Supplemental-Conference.zip]

Archive with 2 entries (2 files):
- Point_M2AE_supp.pdf
- __MACOSX/._Point_M2AE_supp.pdf
